# Supplementary material for: Second-order nonlinear optical properties of transition metal clusters [MoS4Cu4X2Py2] (M = Mo, W; X = Br, I)
Source: Royal Society of Chemistry journal article supplement (doi:10.1039/b903582f), 2009-01-01
Supplement: b903582f.pdf [file b903582f.pdf]

## Supplementary information

### Second-order optical properties of inorganic metal clusters

#### [MoS<sub>4</sub>Cu<sub>4</sub>X<sub>2</sub>Py<sub>2</sub>] (M= Mo, W; X= Br, I)

Qiaohong Li,<sup>a</sup> Kechen Wu,<sup>\*a</sup> Yongqin Wei,<sup>a</sup> Rongjian Sa,<sup>a</sup> Yiping Cui,<sup>\*b</sup> Cangui Lu<sup>b</sup> and Jing Zhu,<sup>b</sup> and Jiangang He<sup>a</sup>

*State Key Laboratory of Structural Chemistry, Fujian Institute of Research on the Structure of Matter, Chinese Academy of Sciences, Fuzhou, Fujian 350002, People's Republic of China, Advanced Photonics Center, Southeast University, Nanjing 210096, People's Republic of China.*

---

<sup>a</sup>Fujian Institute of Research on the Structure of Matter.

<sup>b</sup>Advanced Photonics Center, Southeast University.

## Contents

**1. Table 1S.** Cartesian coordinates (Å) of three model clusters, WS<sub>4</sub>Cu<sub>4</sub>Br<sub>2</sub>Py<sub>6</sub> (**1**), WS<sub>4</sub>Cu<sub>4</sub>I<sub>2</sub>Py<sub>6</sub> (**2**) and MoS<sub>4</sub>Cu<sub>4</sub>Br<sub>2</sub>Py<sub>6</sub> (**3**).

| WS <sub>4</sub> Cu <sub>4</sub> Br <sub>2</sub> Py <sub>6</sub> ( <b>1</b> ) |          |          |          | WS <sub>4</sub> Cu <sub>4</sub> I <sub>2</sub> Py <sub>6</sub> ( <b>2</b> ) |          |          |          |
|------------------------------------------------------------------------------|----------|----------|----------|-----------------------------------------------------------------------------|----------|----------|----------|
|                                                                              | <i>x</i> | <i>y</i> | <i>z</i> |                                                                             | <i>x</i> | <i>y</i> | <i>z</i> |
| W                                                                            | 0.0000   | 0.0000   | 0.0382   | W                                                                           | 0.0000   | 0.0000   | 0.0599   |
| Br                                                                           | 4.1627   | -1.6029  | 1.6927   | I                                                                           | 4.2407   | -1.6659  | 1.9338   |
| Br                                                                           | -4.1627  | 1.6029   | 1.6927   | I                                                                           | -4.2407  | 1.6659   | 1.9338   |
| Cu                                                                           | 1.6653   | 2.1881   | 0.0014   | Cu                                                                          | 2.2284   | -1.6596  | 0.1242   |
| Cu                                                                           | 2.2106   | -1.6600  | 0.0963   | Cu                                                                          | -1.6550  | -2.2008  | 0.0158   |
| Cu                                                                           | -1.6653  | -2.1881  | 0.0014   | Cu                                                                          | -2.2284  | 1.6596   | 0.1242   |
| Cu                                                                           | -2.2106  | 1.6600   | 0.0963   | Cu                                                                          | 1.6550   | 2.2008   | 0.0158   |
| S                                                                            | 1.8694   | 0.2225   | -1.2324  | S                                                                           | 0.2410   | -1.8772  | 1.3128   |
| S                                                                            | -0.2373  | 1.8791   | 1.2961   | S                                                                           | -0.2410  | 1.8772   | 1.3128   |
| S                                                                            | -1.8694  | -0.2225  | -1.2324  | S                                                                           | -1.8737  | -0.2277  | -1.2035  |
| S                                                                            | 0.2373   | -1.8791  | 1.2961   | S                                                                           | 1.8737   | 0.2277   | -1.2035  |
| N                                                                            | 1.6464   | 3.6967   | -1.4459  | N                                                                           | 2.8637   | -3.0970  | -1.2005  |
| N                                                                            | 3.2515   | 2.7441   | 1.1566   | N                                                                           | 3.2436   | 2.7669   | 1.1551   |
| N                                                                            | 2.8448   | -3.1249  | -1.1974  | N                                                                           | 1.5849   | 3.7166   | -1.4141  |
| N                                                                            | -1.6464  | -3.6967  | -1.4459  | N                                                                           | -2.8637  | 3.0970   | -1.2005  |
| N                                                                            | -3.2515  | -2.7441  | 1.1566   | N                                                                           | -3.2436  | -2.7669  | 1.1551   |
| N                                                                            | -2.8448  | 3.1249   | -1.1974  | N                                                                           | -1.5849  | -3.7166  | -1.4141  |
| C                                                                            | 2.2479   | 3.4887   | -2.6389  | C                                                                           | 2.0068   | -3.5784  | -2.1256  |
| C                                                                            | 2.3908   | 4.4867   | -3.6005  | C                                                                           | 2.3823   | -4.5054  | -3.0957  |
| C                                                                            | 1.8981   | 5.7653   | -3.3264  | C                                                                           | 3.7062   | -4.9483  | -3.1312  |
| C                                                                            | 1.2742   | 5.9907   | -2.0966  | C                                                                           | 4.6024   | -4.4424  | -2.1864  |
| C                                                                            | 1.1694   | 4.9360   | -1.1921  | C                                                                           | 4.1442   | -3.5283  | -1.2395  |
| C                                                                            | 4.3357   | 1.9465   | 1.2814   | C                                                                           | 4.3690   | 2.0207   | 1.2010   |
| C                                                                            | 5.4577   | 2.3134   | 2.0241   | C                                                                           | 5.4872   | 2.3894   | 1.9481   |
| C                                                                            | 5.4740   | 3.5518   | 2.6669   | C                                                                           | 5.4549   | 3.5776   | 2.6784   |
| C                                                                            | 4.3518   | 4.3782   | 2.5505   | C                                                                           | 4.2911   | 4.3531   | 2.6410   |
| C                                                                            | 3.2698   | 3.9376   | 1.7935   | C                                                                           | 3.2156   | 3.9126   | 1.8748   |
| C                                                                            | 1.9937   | -3.6537  | -2.1015  | C                                                                           | 2.1992   | 3.5490   | -2.6070  |
| C                                                                            | 2.3855   | -4.5989  | -3.0468  | C                                                                           | 2.3068   | 4.5658   | -3.5535  |
| C                                                                            | 3.7210   | -5.0074  | -3.0794  | C                                                                           | 1.7632   | 5.8200   | -3.2632  |
| C                                                                            | 4.6102   | -4.4535  | -2.1547  | C                                                                           | 1.1288   | 6.0041   | -2.0319  |
| C                                                                            | 4.1349   | -3.5256  | -1.2294  | C                                                                           | 1.0609   | 4.9330   | -1.1430  |
| C                                                                            | -2.2479  | -3.4887  | -2.6389  | C                                                                           | -2.0068  | 3.5784   | -2.1256  |
| C                                                                            | -2.3908  | -4.4867  | -3.6005  | C                                                                           | -2.3823  | 4.5054   | -3.0957  |
| C                                                                            | -1.8981  | -5.7653  | -3.3264  | C                                                                           | -3.7062  | 4.9483   | -3.1312  |
| C                                                                            | -1.2742  | -5.9907  | -2.0966  | C                                                                           | -4.6024  | 4.4424   | -2.1864  |
| C                                                                            | -1.1694  | -4.9360  | -1.1921  | C                                                                           | -4.1442  | 3.5283   | -1.2395  |

---

|   |         |         |         |   |         |         |         |
|---|---------|---------|---------|---|---------|---------|---------|
| C | -4.3357 | -1.9465 | 1.2814  | C | -4.3690 | -2.0207 | 1.2010  |
| C | -5.4577 | -2.3134 | 2.0241  | C | -5.4872 | -2.3894 | 1.9481  |
| C | -5.4740 | -3.5518 | 2.6669  | C | -5.4549 | -3.5776 | 2.6784  |
| C | -4.3519 | -4.3782 | 2.5505  | C | -4.2911 | -4.3531 | 2.6410  |
| C | -3.2699 | -3.9376 | 1.7935  | C | -3.2156 | -3.9126 | 1.8748  |
| C | -1.9937 | 3.6537  | -2.1015 | C | -2.1992 | -3.5490 | -2.6070 |
| C | -2.3855 | 4.5989  | -3.0468 | C | -2.3068 | -4.5658 | -3.5535 |
| C | -3.7210 | 5.0074  | -3.0794 | C | -1.7632 | -5.8200 | -3.2632 |
| C | -4.6102 | 4.4535  | -2.1547 | C | -1.1288 | -6.0041 | -2.0319 |
| C | -4.1349 | 3.5255  | -1.2294 | C | -1.0609 | -4.9330 | -1.1430 |

---

MoS<sub>4</sub>Cu<sub>4</sub>Br<sub>2</sub>Py<sub>6</sub> (**3**)

---

|    | <i>x</i> | <i>y</i> | <i>z</i> |
|----|----------|----------|----------|
| Mo | 0.0000   | 0.0000   | 0.0417   |
| Br | 4.4390   | 0.2829   | 1.6930   |
| Br | -4.4390  | -0.2829  | 1.6930   |
| Cu | 2.6890   | -0.5838  | 0.0753   |
| Cu | 0.5850   | 2.6712   | 0.0099   |
| Cu | -2.6890  | 0.5838   | 0.0753   |
| Cu | -0.5850  | -2.6712  | 0.0099   |
| S  | 1.6073   | 0.9985   | -1.2190  |
| S  | -1.6073  | -0.9985  | -1.2190  |
| S  | -1.0241  | 1.6186   | 1.2825   |
| S  | 1.0241   | -1.6186  | 1.2825   |
| N  | 3.8943   | -1.6421  | -1.2062  |
| N  | -1.7955  | -3.8359  | 1.1719   |
| N  | 0.0689   | -4.0443  | -1.4277  |
| N  | -3.8943  | 1.6421   | -1.2062  |
| N  | 1.7955   | 3.8359   | 1.1719   |
| N  | -0.0689  | 4.0443   | -1.4277  |
| C  | 3.3560   | -2.4892  | -2.1082  |
| C  | 4.1209   | -3.1893  | -3.0385  |
| C  | 5.5040   | -2.9949  | -3.0583  |
| C  | 6.0653   | -2.1065  | -2.1376  |
| C  | 5.2329   | -1.4581  | -1.2267  |
| C  | -3.1182  | -3.5761  | 1.2757   |
| C  | -3.9865  | -4.3792  | 2.0145   |
| C  | -3.4818  | -5.4993  | 2.6757   |
| C  | -2.1127  | -5.7680  | 2.5821   |
| C  | -1.3112  | -4.9158  | 1.8277   |
| C  | -0.5631  | -4.1193  | -2.6207  |
| C  | -0.2550  | -5.0788  | -3.5829  |
| C  | 0.7474   | -6.0131  | -3.3090  |
| C  | 1.4061   | -5.9445  | -2.0786  |
| C  | 1.0391   | -4.9508  | -1.1734  |

---

---

|   |         |        |         |
|---|---------|--------|---------|
| C | -3.3560 | 2.4892 | -2.1082 |
| C | -4.1209 | 3.1893 | -3.0385 |
| C | -5.5040 | 2.9949 | -3.0583 |
| C | -6.0653 | 2.1065 | -2.1376 |
| C | -5.2329 | 1.4581 | -1.2267 |
| C | 3.1182  | 3.5761 | 1.2757  |
| C | 3.9865  | 4.3792 | 2.0145  |
| C | 3.4818  | 5.4993 | 2.6757  |
| C | 2.1127  | 5.7680 | 2.5821  |
| C | 1.3112  | 4.9158 | 1.8277  |
| C | 0.5631  | 4.1193 | -2.6207 |
| C | 0.2550  | 5.0788 | -3.5829 |
| C | -0.7474 | 6.0131 | -3.3090 |
| C | -1.4061 | 5.9445 | -2.0786 |
| C | -1.0391 | 4.9508 | -1.1734 |

---

2. **Fig. 1S** HRS experimental setup.

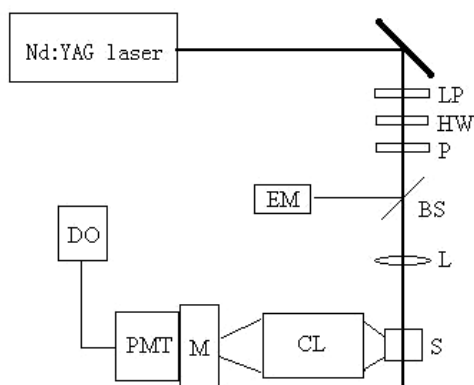

LP, long pass filter; HW, half-wave plate; P, polarizer; BS, beam splitter; EM, energy meter; L, lens; S, sample cell; CL, collection lens; M, monochromator; PMT, photo-multiplied tube; DO, digital oscilloscope.

3. **Fig. 2S** Illustrations of the orbital-pair transitions and corresponding CT routes involved in the intense lowest-energy electronic excitation.

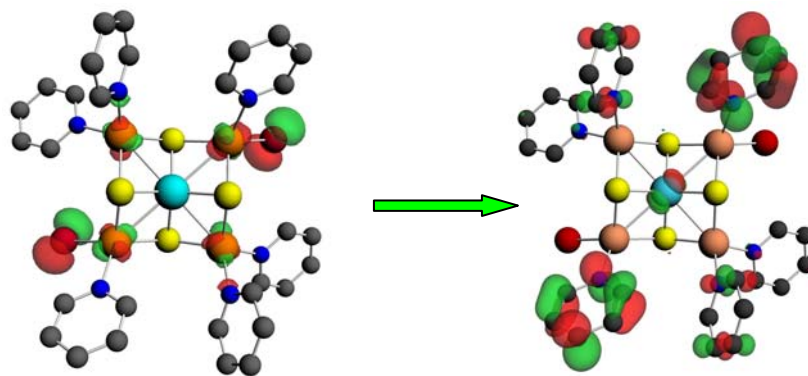

H-7 → L+7, LLCT
